# Supplementary material for: In C. elegans, High Levels of dsRNA Allow RNAi in the Absence of RDE-4
Source: PLOS journal article supplement (doi:10.1371/journal.pone.0004052), 2008-12-26
Supplement: S1 (10.1371/journal.pone.0004052.s001) [file journal.pone.0004052.s001]

|        | WT-S | WT-AS | WT-S | WT-AS | A-S | A-AS | A-S  | A-AS | A4-S | A4-AS | A4-S | A4-AS | A1-S | A1-AS | A1-S | A1-AS | A14-S | A14-AS | A14-S | A14-AS |
|--------|------|-------|------|-------|-----|------|------|------|------|-------|------|-------|------|-------|------|-------|-------|--------|-------|--------|
| WT-S   |      | 0.31  |      |       |     |      |      |      |      |       |      |       |      |       |      |       |       |        |       |        |
| WT-AS  |      |       |      |       |     |      |      |      |      |       |      |       |      |       |      |       |       |        |       |        |
| WT-S   |      |       |      | 0.03  |     |      | 0.04 |      |      |       |      |       |      |       | 0.05 |       |       |        |       |        |
| WT-AS  |      |       |      |       |     |      |      | 0.02 |      |       |      |       |      |       |      |       |       |        |       |        |
| A-S    |      |       |      |       |     | 0.03 | 0.09 |      |      |       |      |       |      |       |      |       |       |        |       |        |
| A-AS   |      |       |      |       |     |      |      | 0.09 |      |       |      |       |      |       |      |       |       |        |       |        |
| A-S    |      |       |      |       |     |      |      | 0.07 |      |       |      |       |      |       |      |       |       |        |       |        |
| A-AS   |      |       |      |       |     |      |      |      |      |       |      |       |      |       |      |       |       |        |       |        |
| A4-S   |      |       |      |       |     |      |      |      |      | 0.13  |      |       |      |       |      |       |       |        |       |        |
| A4-AS  |      |       |      |       |     |      |      |      |      |       |      |       |      |       |      |       |       |        |       |        |
| A4-S   |      |       |      |       |     |      |      |      |      |       |      | 0.15  |      |       |      |       |       |        |       |        |
| A4-AS  |      |       |      |       |     |      |      |      |      |       |      |       |      |       |      |       |       |        |       |        |
| A1-S   |      |       |      |       |     |      |      |      |      |       |      |       |      | 0.28  |      |       |       |        |       |        |
| A1-AS  |      |       |      |       |     |      |      |      |      |       |      |       |      |       |      |       |       |        |       |        |
| A1-S   |      |       |      |       |     |      |      |      |      |       |      |       |      |       |      | 0.33  |       |        |       |        |
| A1-AS  |      |       |      |       |     |      |      |      |      |       |      |       |      |       |      |       |       |        |       |        |
| A14-S  |      |       |      |       |     |      |      |      |      |       |      |       |      |       |      |       |       | 0.95   |       |        |
| A14-AS |      |       |      |       |     |      |      |      |      |       |      |       |      |       |      |       |       |        |       |        |
| A14-S  |      |       |      |       |     |      |      |      |      |       |      |       |      |       |      |       |       |        |       | 0.65   |
| A14-AS |      |       |      |       |     |      |      |      |      |       |      |       |      |       |      |       |       |        |       |        |

**Figure S1. Relevant P-values.** P-values for differences in GFP siRNAs in comparisons between sense (S) and antisense (AS) siRNAs, or between various strains, untreated (black font) or heat shocked (red font). Strains are indicated as wildtype (WT) or with letters/digits that represent genes containing mutations: *adr*, A; *rde-4*, 4; *rde-1*, 1. P-values were derived from a student's t-test, two tailed, equal variance.
